# Supplementary material for: Response of diatom assemblages to the disruption of the running water continuum in urban areas, and its consequences on bioassessment
Source: PeerJ. 2021 Nov 23;9:e12457. doi: 10.7717/peerj.12457 (PMC8621708; doi:10.7717/peerj.12457)
Supplement: Supplemental Information 1 [file peerj-09-12457-s001.xlsx]

## Sheet: Arkusz1
			Number of valves in samples
No.	Name of species	Diatom species cod	O171027S1	O180126S1	O180322s1	O180521s1	O180830s1	O171027S2	O180126S2	O180322s2	O180521s2	O180709s2	O180830s2	O171027S3	O180126S3	O180322s3	O180521s3	O180709s3	O180830s3	O171027S4	O180126S4	O180521s4	O171027S5	O180126S5	O180521s5
1.	Achnanthes coarctata Brébisson Grunow	ACOA			1						1										4		1		1
2.	Achnanthidium minutissimum (Kützing) Czarnecki	ADMI	7	6	8	10	32	68	162	93	38	108	128	64	44	49	104	62	104	93	52	62	24	41	42
3.	Amphora inariensis Krammer	AINA															1
4.	Amphora montana Krasske	AMMO		1			4	6		2		27	7				1					1			2
5.	Amphora pediculus (Kützing) Grunow	APED									5		3	7			2						4	3	10
6.	Amphora veneta Kützing	AVEN																			8	1
7.	Aulacoseira granulata (Ehrenberg) Simonsen	AUGR															1			3
8.	Caloneis lancettula (Schulz) Lange-Bertalot & Witkowski	CLCT												1		3								4	2
9.	Caloneis silicula (Ehrenberg) Cleve	CSIL						1
10.	Cocconeis placentula Ehrenberg	CPLA	15
11.	Cocconeis placentula var. euglypta (Ehrenberg) Grunow	CPLE																					1
12.	Cocconeis placentula var. lineata (Ehrenberg) Van Heurck	CPLI		8	6	15	14														1
13.	Craticula ambigua (Ehrenberg) D.G.Mann	CAMB																		1			1
14.	Craticula buderi (Hustedt) Lange-Bertalot	CRBU															5		1			3			12
15.	Craticula cuspidata (Kützing) D.G. Mann	CRCU						24	17	43	13	12	13	8			13	8	3	5	2	37	20		74
16.	Craticula minusculoides (Hustedt) Lange-Bertalot	CMNO		1
17.	Ctenophora pulchella (Ralfs ex Kützing) D.M.Williams & Round	CTPU		8	32	108	24	1			4	3							2
18.	Cyclostephanos dubius (Fricke) Round	CDUB												1									1
19.	Cyclotella atomus Hustedt	CATO								8										84	44		6
20.	Cyclotella meneghiniana Kützing	CMEN						4				5	23	5	1	2		12	22	32	24	8	5
21.	Cyclotella ocellata Pantocsek	COCE							2												11
22.	Cymbella neocistula Krammer	CNCI															1
23.	Cymbopleura amphicephala (Nägeli ex Kützing) Krammer	CBAM											1
24.	Denticula subtilis Grunow	DSUB													1		1
25.	Denticula tenuis Kützing	DTEN												3
26.	Diadesmis contenta (Grunow) D.G.Mann	DCOT			2	1	1														4				3
27.	Diadesmis perpusilla (Grunow) D.G.Mann	DPER																1
28.	Diatoma vulgaris Bory	DVUL								2						2		1		1		2			1
29.	Discostella pseudostelligera (Hustedt) Houk & Klee	DPST											15						66	22	16	2
30.	Diplonies separanda Lange-Bertalot	DOBL																							1
31.	Encyonema caespitosum Kützing	ENCA																		1
32.	Encyonema minutum (Hilse in Rabenhorst) D.G. Mann	ENMI								1		4	1									1
33.	Encyonema prostratum (Berkeley) Kützing	EPRO																							1
34.	Encyonema silesiacum (Bleisch in Rabenhorst) D.G. Mann	ESLE						2	2					3			4			2	1
35.	Eolimna subminuscula (Manguin) Gerd Moser, Lange-Bertalot & Metzeltin	ESBM																			1			1
36.	Fallacia insociabilis (Krasske) D.G.Mann in Round, R.M.Crawford & D.G.Mann	FINS							1
37.	Fallacia pygmea (Kützing) Stickle & Mann ssp. pygmea	FPYG																		1			1		1
38.	Fragilaria capucina var. gracilis (Østrup) Hustedt	FCGR						2	4			2	5	3					4	7			4	23	3
39.	Fragilaria capucina Desmazières var. capucina	FCAP														4							3
40.	Fragilaria capucina var. mesolepta (Rabenhorst) Rabenhorst	FCME																		1
41.	Fragilaria capucina var. rumpens (Kützing) Lange-Bertalot	FCRU							3											3	3
42.	Fragilaria capucina var. vaucheriae (Kützing) Lange-Bertalot	FCVA						3	5	2	12	3	1	4		1		2	4
43.	Fragilaria delicatissima (W. Smith) Lange-Bertalot	FDEL						8	6					3	2				12					5
44.	Fragilaria nanana Lange-Bertalot	FNAN							4		113	15	22	7			35	22	42	8	24	74	6		14
45.	Fragilaria tenera (W.Smith) Lange-Bertalot	FTEN							3	1	54		10	2			14	16	18		12	17	1
46.	Frustulia vulgaris (Thwaites) De Toni	FVUL		1		4	2	55	18	2	1	2	1	2	8	17	2			1	1	1		2
47.	Gomphonema acidoclinatum Lange-Bertalot & Reichardt	GADC	1										3
48.	Gomphonema acuminatum Ehrenberg	GACU							1			6	1			1		1
49.	Gomphonema angustatum (Kützing) Rhabenhorst	GANG		2				1												1	2
50.	Gomphonema clavatulum Reichardt	GCVT				1				1						1
51.	Gomphonema exillisimum Grunow	GEXL															1
52.	Gomphonema italicum Kützing	GITA																				2
53.	Gomphonema micropus Kützing	GMIC	1													4	2	3	1	1			1		8
54.	Gomphonema olivaceum var. olivaceum (Hornemann) Ehrenberg	GOLI		1			2
55.	Gomphonema pala Reichardt	GOPA								4				2									3
56.	Gomphonema parvulum var. parvulum f. parvulum (Kützing) Kützing	GPAR	12	13	6	26	8	3	11	14	7	6	14	15	8	2	21	3	8	24	17	21	21	21	16
57.	Gomphonema parvulum var. parvulum f. saprophilum Lange-Bertalot & E.Reichardt	GPAS	33	13	14	42	28		6		14	3	4	5		5	9	18	18	8	7	35		2	44
58.	Gomphonema productum (Grunow) Lange-Bertalot & E.Reichardt	GPRO				2																			1
59.	Gomphonema truncatum Ehrenberg	GTUN						1	13	1		7	7		1		2			5		3
60.	Halamphora normanii (Rabenhorst) Levkov	HNOR																		1
61.	Hatzschia amphioxys (Ehrenberg) Grunow	HAMP	3	1	3		2	2		4	3	4	2	1					1	4	11	7			3
62.	Hippodonta capitata (Ehrenberg) Lange-Bertalot, Metzeltin & Witkowski	HCAP		1		2								3	2	15	32	44		1		1	6
63.	Hippodonta hungarica (Grunow) Lange-Bertalot, Metzeltin & Witkowski	HHUN	1
64.	Karayevia clevei var. clevei (Grunow) Bukhtiyarova	KCLE								1													1
65.	Luticola acidoclinata Lange-Bertalot	LACI												1							9
66.	Luticola cohnii (Hilse) D.G.Mann	LCOH												1
67.	Luticola goeppertiana (Bleisch) D.G. Mann	LGOE						1			1	1	3	38	25	4	1	104	22	1	1		6	7	12
68.	Luticola mutica (Kützing) D.G. Mann	LMUT			1	1	1	1	2	1		1	3		2		2		3			12			3
69.	Luticola nivalis (Ehrenberg) D.G. Mann	LNIV	1			1													1				1
70.	Luticola saprophila Levkov, Metzeltin & A.Pavlov	LSAP												7				42				3
71.	Luticola ventriconfusa Lange-Bertalot	LVCF				1			1												3		2
72.	Luticola ventricosa (Kützing) D.G. Mann	LVEN																				1		1
73.	Mayamaea atomus (Kützing) Lange-Bertalot	MAAT		3	2																4
74.	Mayamaea atomus var. permitis (Hustedt) Lange-Bertalot	MAPE		5					2
75.	Melosira varians Agardh	MVAR																		3		8	2		6
76.	Meridion circulare (Gréville) Agardh var. circulare	MCIR									29	2		3			8	2	1			1	1		2
77.	Navicula cari Ehrenberg	NCAR		1					2
78.	Navicula cincta (Ehrenberg) Ralfs in Pritchard	NCIN	2			1																3
79.	Navicula cryptocephala Kützing	NCRY						7	7	1	1	2	5			3	1	4	1	3	4	16		1
80.	Navicula cryptotenella Lange-Bertalot	NCTE						1
81.	Navicula gregaria Donkin	NGRE	158	94	53	42	53	24	18	2	15	4	6	65	122	93	8	2	16	3	12	15	17	113	57
82.	Navicula integra (W. Smith) Ralfs	NITG
83.	Navicula lacuum Lange-Bertalot, Hofmann, Werum & Van de Vijver	NLAC					1																2
84.	Navicula lanceolata (Agardh) Ehrenberg	NLAN		1										92	173	73	2	8	1	1	3	2	16	93	8
85.	Navicula slesvicensis Grunow	NSLE									1
86.	Navicula tenelloides Hustedt	NTEN	1				2	1				6								2			1
87.	Navicula trivialis Lange-Bertalot	NTRV															1					2
88.	Navicula veneta Kützing	NVEN	4	1	6	6	8	8	5	1		14	8	2	4	1		2	6		11	4	3	2	6
89.	Nitzschia acicularis (Kützing) W. Smith	NACI																		1		7	2
90.	Nitzschia acidoclinata Lange-Bertalot	NACD																		1
91.	Nitzschia amphibia Grunow	NAMP	2	1	2	2	1	1	2	10	2	1		2	3	2	2			1	1	1	1	1	4
92.	Nitzschia angustatula Lange-Bertalot	NZAG						1													1
93.	Nitzschia capitellata Hustedt	NCPL																		7	4		4
94.	Nitzschia communis Rabenhorst	NCOM	2				1																1
95.	Nitzschia constricta (Kützing) Ralfs	NCOT																							1
96.	Nitzschia debilis (Arnott) Grunow	NDEB	3																		3				3
97.	Nitzschia dissipata (Kützing) Grunow	NDIS																			3				5
98.	Nitzschia frustulum (Kützing) Grunow	NIFR	13	7		22	18	5	2	20	6	34	35	8	11	4	12	13	12	12	3		12	1	1
99.	Nitzschia frustulum var. inconspicua (Grunow) Grunow	NINC	16	7	2	3	12	2	6			3	1		1						5			4
100.	Nitzschia gracilis Hantzsch	NIGR																				1
101.	Nitzschia hungarica Grunow	NIHU																	1	4			5
102.	Nitzschia intermedia Hantzsch	NINT																							1
103.	Nitzschia lacuum Lange-Bertalot	NILA																					2
104.	Nitzschia linearis (Agardh) W. Smith	NLIN		1										1									4
105.	Nizschia microcephala Grunow	NMIC	1
106.	Nitzschia palea (Kützing) W. Smith	NPAL	3					4	5		5		1	2		3	1		4	11	26	14	6	4	2
107.	Nitzschia paleacea (Grunow) Grunow	NPAE		1			2		5				1			3				4	8	5	2	1
108.	Nitzschia perminuta (Grunow) M. Peragallo	NIPM									8			1							7
109.	Nitzschia pusilla Grunow	NIPU					2
110.	Nitzschia subacicularis Hustedt	NSUA													1	4					15
111.	Nitzschia supralitorea Lange-Bertalot	NZSU					2												3			8			1
112.	Nitzschia trybionella Hantzsch	NTRY																			1
113.	Nitzschia umbonata (Ehrenberg) Lange-Bertalot	NUMB		113	96	8
114.	Pinnularia borealis Ehrenberg	PBOR																				8
115.	Pinnularia grunowii Krammer	PGRU																1
116.	Pinnularia brebissonii (Kützing) Rabenhorst	PBRE				3	3	1										1
117.	Pinnularia frequenis Ehrenberg	PFQT			3
118.	Pinnularia microstauron (Ehrenberg) Cleve	PMIC				1
119.	Pinnularia obscura Krasske	POBS				1						1									1
120.	Placoneis paraelginensis Lange-Bertalot	PPAE					1	1															1
121.	Planothidium frequentissimum (Lange-Bertalot) Lange-Bertalot	PLFR	6	18	7	27	32	17	27	24	3	114	22	26	11	12	27	22	13	38	14	23	8	49	24
122.	Pseudostaurosira brevistriata (Grunow) D.M.Williams & Round	PSBR	1
123.	Rhoicosphenia abbreviata (Agardh) Lange-Bertalot	RABB											2					1
124.	Sellaphora bacillum (Ehrenberg) D.G.Mann	SEBA															1
125.	Sellaphora pupula (Kützing) Mereschkowsky	SPUP												1			1	1	2	3				1	1
126.	Stauroneis anceps Ehrenberg	STAN						3												1
127.	Stauroneis gracilis Ehrenberg	SGRC						132	48	125	31	21	34	28	14	56	33	18	3		3	8	21	1	22
128.	Stauroneis kriegeri Patrick	STKR																					1
129.	Stauroneis phoenicenteron (Nitzsch) Ehrenberg	SPHO								3	5	1				2	1
130.	Stauroneis subgracilis Lange-Bertalot & Krammer	SSGR								45	5	1	14			25	8
131.	Staurosira pinnata Ehrenberg	SRPI												1									3	1	3
132.	Stephanodiscus hantzschii Grunow	SHAN																		11	22		6
133.	Surirella angusta Kützing	SANG				2		2			1					2					1			2
134.	Surirella brebissonii Krammer & Lange-Bertalot	SBRE
135.	Surirella brebissonii var. kuetzingii Krammer & Lange-Bertalot	SBKU	93	53	113	22	88	1	2	1	9	1	2	4	1	8				4	1			32
136.	Surirella minuta Brébisson	SUMI																		1
137.	Tabularia fasciculata (C.Agardh) D.M.Williams & Round	TFAS	57	68	53	66	74	8	12	14	6	4	14	4	1	12	3	4	3	8	3	1	10	3
138.	Ulnaria acus (Kützing) Aboal	UUAC						3	4	3	2	1		2		8	3	2		3	4		4
139.	Ulnaria ulna (Nitzsch) Compere	UULN	2	3	1			6	4	7	19	3	5	9		16	21	1	4	4	6	5	11	2	2
